# Supplementary material for: Anticancer potential of Thevetia peruviana fruit methanolic extract
Source: PubMed Central journal article supplement (PMC5414213; doi:10.1186/s12906-017-1727-y), 2017-05-02

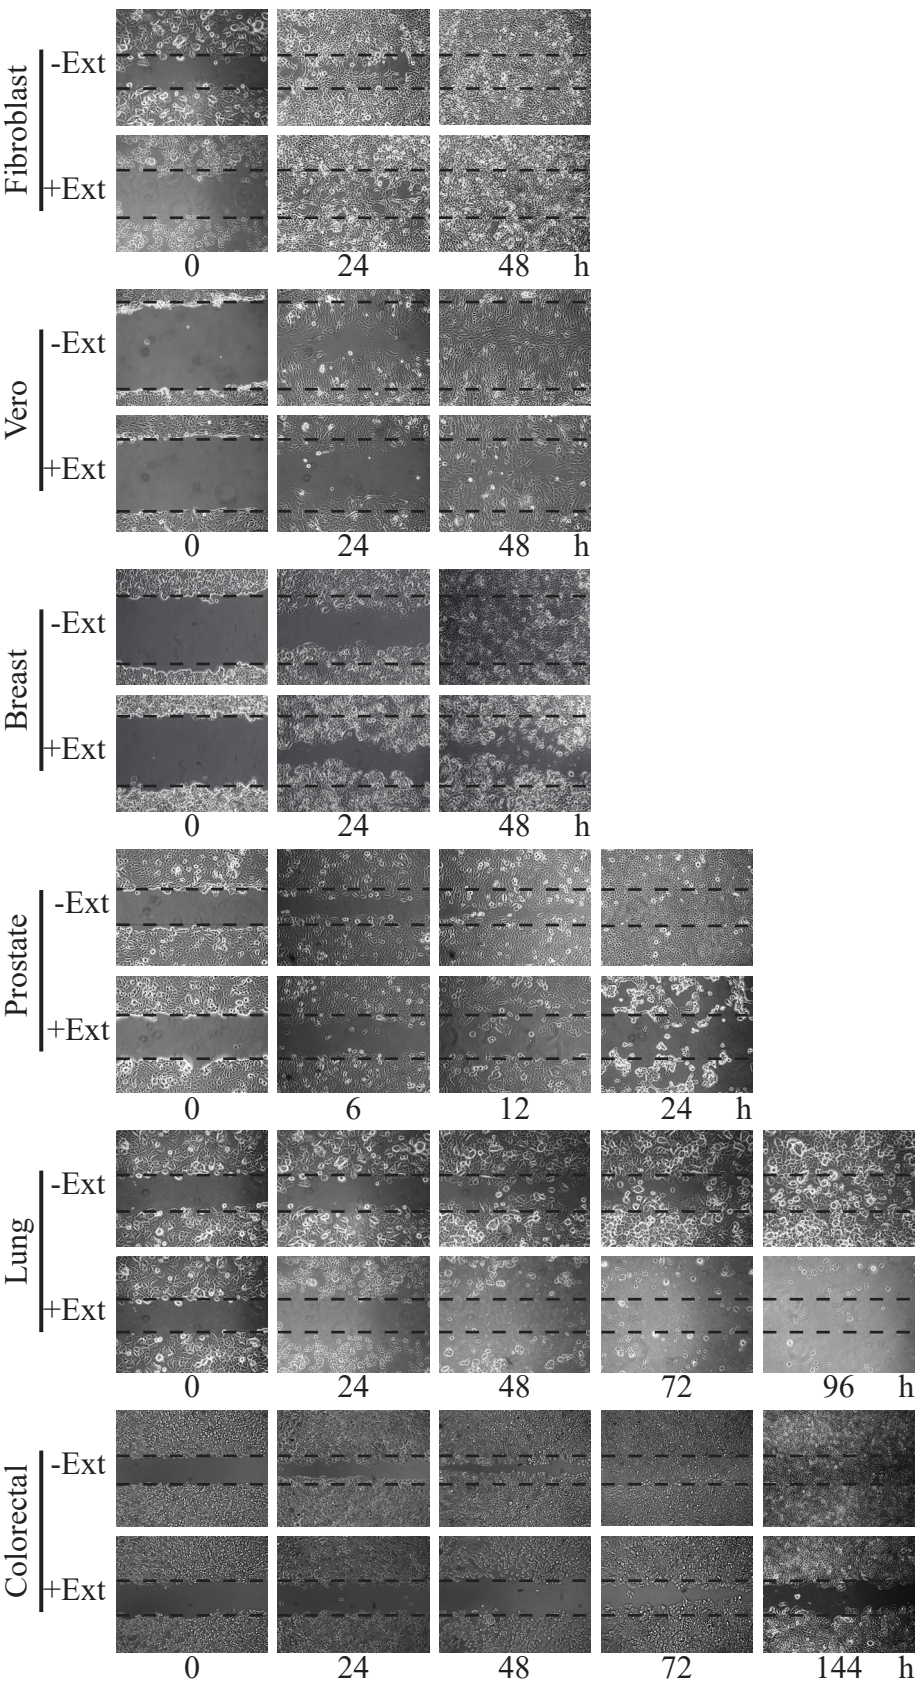

Supplement: 12906_2017_1727_MOESM2_ESM.pdf [file 12906_2017_1727_MOESM2_ESM.pdf]
