# Supplementary material for: Anticancer potential of Thevetia peruviana fruit methanolic extract
Source: PubMed Central journal article supplement (PMC5414213; doi:10.1186/s12906-017-1727-y), 2017-05-02

Independent component 3

A

$d = 1$

Independent component 3

B

$d = 0.5$

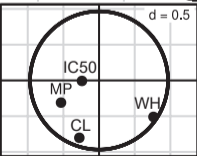

Independent component 1

Independent component 1

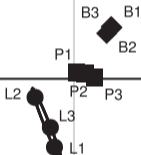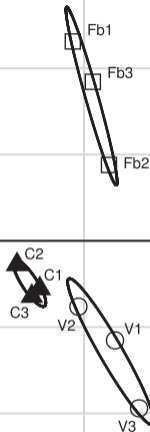

Supplement: 12906_2017_1727_MOESM5_ESM.pdf [file 12906_2017_1727_MOESM5_ESM.pdf]
