# Supplementary material for: Anticancer potential of Thevetia peruviana fruit methanolic extract
Source: Springer Nature journal article supplement (doi:10.1186/s12906-017-1727-y), 2017-05-02

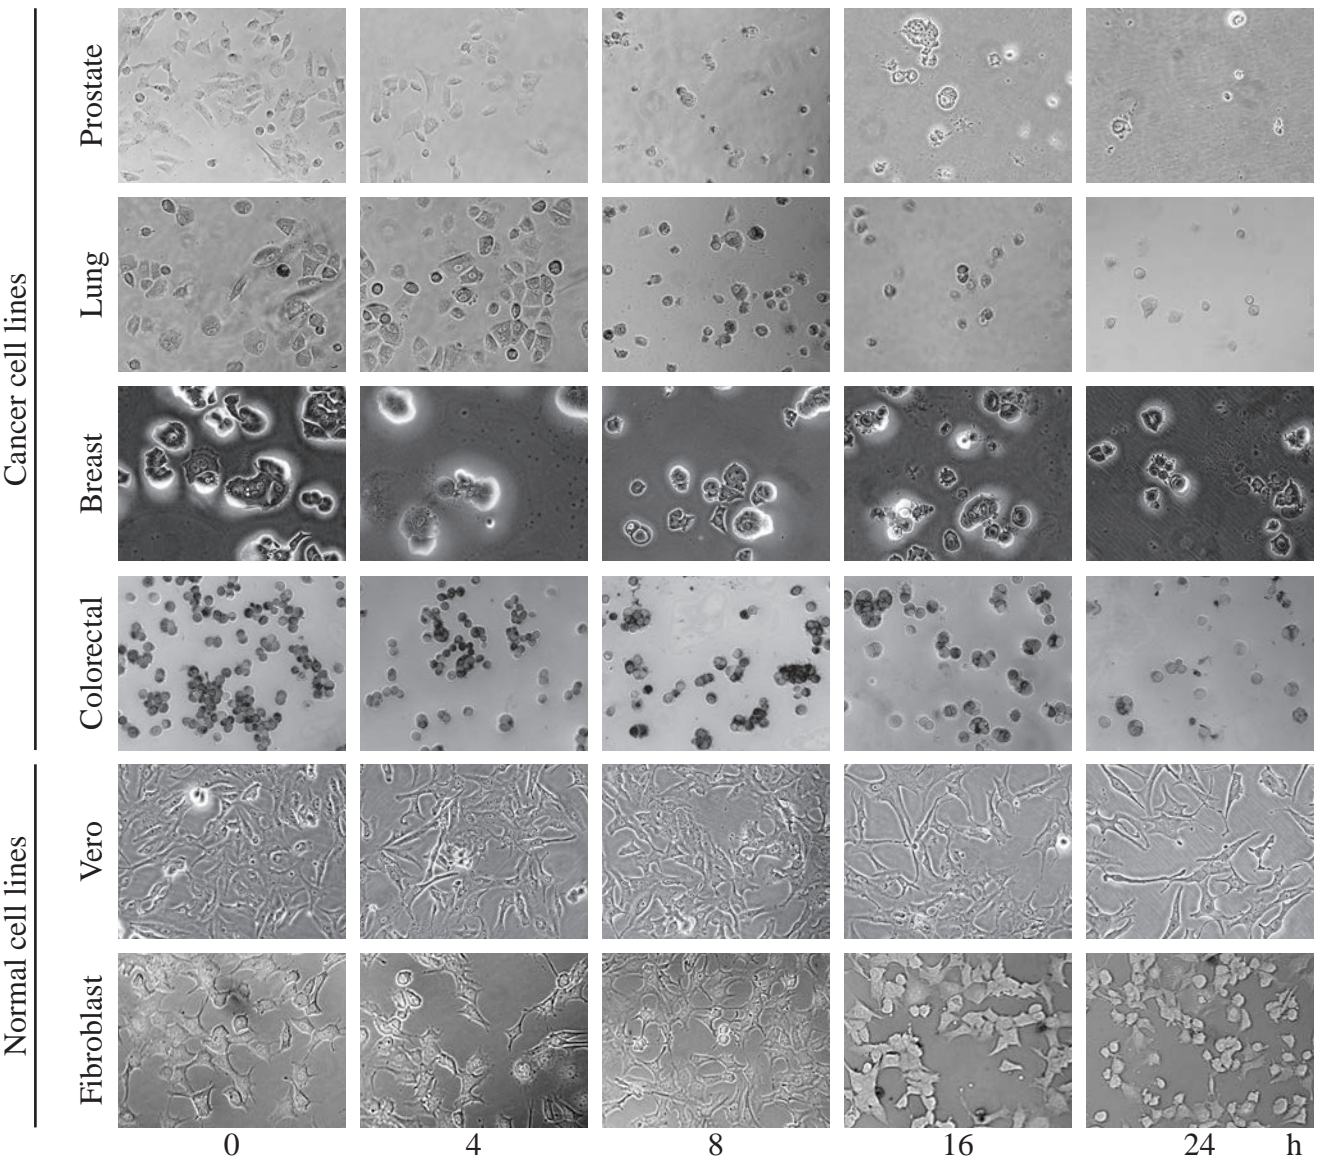

Supplement: MOESM4 [file 12260588]
